# Supplementary material for: Comparison of the efficacy and safety in the treatment strategies between chemotherapy combined with antiangiogenic and with immune checkpoint inhibitors in advanced non-small cell lung cancer patients with negative PD-L1 expression: A network meta-analysis
Source: PubMed Central journal article supplement (PMC9746688; doi:10.3389/fonc.2022.1001503), 2022-11-29
Supplement: DataSheet_1.pdf [file DataSheet_1.pdf]

**Comparison of the efficacy and safety in the treatment strategies between chemotherapy combined with antiangiogenic and with immune checkpoint inhibitors in advanced non-small cell lung cancer patients with negative PD-L1 expression: A network meta-analysis**

**Supplementary materials**

((randomized controlled trial[Publication Type] OR randomized[Title/Abstract] OR placebo[Title/Abstract]) AND (((((((((((((((((((((((Immuno[MeSH Terms] OR (PD-1[Title/Abstract])) OR (PD-L1[Title/Abstract])) OR (CTLA-4[Title/Abstract])) OR (Pembrolizumab[Title/Abstract])) OR (Keytruda[Title/Abstract])) OR (lambrolizumab[Title/Abstract])) OR (MK-3475[Title/Abstract])) OR (Nivolumab[Title/Abstract])) OR (Atezolizumab[Title/Abstract])) OR (Tecentriq[Title/Abstract])) OR (MPDL3280A[Title/Abstract])) OR (Avelumab[Title/Abstract])) OR (Bavencio[Title/Abstract])) OR (Durvalumab[Title/Abstract])) OR (Imfinzi[Title/Abstract])) OR (Camrelizumab[Title/Abstract])) OR (Tislelizumab[Title/Abstract])) OR (Sintilimab[Title/Abstract])) OR (ipilimumab[Title/Abstract])) OR (tremelimumab[Title/Abstract])) OR (ticilimumab[Title/Abstract])) OR (((((((((((((((((((((((Angiogenesis Inhibitors[MeSH Terms] OR (Inhibitor\*,Angiogen\*[Title/Abstract])) OR (Antagonist\* Angiogen\*[Title/Abstract])) OR (Angiostatic Agent\*[Title/Abstract])) OR (Anti? Angiogen\* Agent\*[Title/Abstract])) OR (Anti? Angiogen\* Drug\*[Title/Abstract])) OR (Inhibitor\*, Neovascularization[Title/Abstract])) OR (VEGFR[Title/Abstract])) OR (multitargeted antiangiogenesis tyrosine kinase inhibitors[Title/Abstract])) OR (\*mab[Title/Abstract])) OR (\*nib[Title/Abstract])) OR (BIBF 1120[Title/Abstract])) OR (votrient[Title/Abstract])) OR (Everolimus[Title/Abstract])) OR (Aflibercept[Title/Abstract])) OR (bevacizumab[Title/Abstract])) OR (ramucirumab[Title/Abstract])) OR (nintedanib[Title/Abstract])) OR (anlotinib[Title/Abstract])) OR (apatinib[Title/Abstract])) OR (Sorafenib[Title/Abstract])) OR (Vandetanib[Title/Abstract])) OR (Sunitinib[Title/Abstract])) OR (Pazopanib[Title/Abstract])) OR (Lenvatinib[Title/Abstract])) OR (Cediranib[Title/Abstract])) OR (Motesanib[Title/Abstract])) OR (Axitinib[Title/Abstract])))) AND (((Carcinoma, Non-Small-Cell Lung[MeSH Terms] OR (Lung Carcinoma\*, Non-Small-Cell[Title/Abstract])) OR (Non?Small ?Cell Lung Cancer[Title/Abstract])) OR (NSCLC[Title/Abstract]))

**Table S1. Literature search strategy on pubmed.**

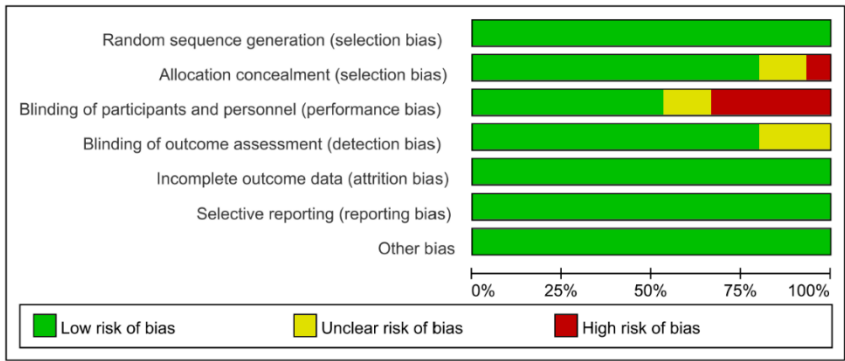

|              | Random sequence generation (selection bias) | Allocation concealment (selection bias) | Blinding of participants and personnel (performance bias) | Blinding of outcome assessment (detection bias) | Incomplete outcome data (attrition bias) | Selective reporting (reporting bias) | Other bias |
|--------------|---------------------------------------------|-----------------------------------------|-----------------------------------------------------------|-------------------------------------------------|------------------------------------------|--------------------------------------|------------|
| BEYOND       | +                                           | +                                       | +                                                         | +                                               | +                                        | +                                    | +          |
| BR29         | +                                           | +                                       | +                                                         | +                                               | +                                        | +                                    | +          |
| Camel        | +                                           | +                                       | -                                                         | +                                               | +                                        | +                                    | +          |
| Camel-sq     | +                                           | +                                       | +                                                         | +                                               | +                                        | +                                    | +          |
| CheckMate227 | +                                           | +                                       | -                                                         | +                                               | +                                        | +                                    | +          |
| ECOG-4599    | +                                           | ?                                       | ?                                                         | ?                                               | +                                        | +                                    | +          |
| IMpower130   | +                                           | +                                       | -                                                         | +                                               | +                                        | +                                    | +          |
| IMpower131   | +                                           | ?                                       | ?                                                         | ?                                               | +                                        | +                                    | +          |
| IMpower132   | +                                           | +                                       | -                                                         | +                                               | +                                        | +                                    | +          |
| IMpower150   | +                                           | -                                       | -                                                         | ?                                               | +                                        | +                                    | +          |
| TASUKI 52    | +                                           | +                                       | +                                                         | +                                               | +                                        | +                                    | +          |
| KEYNOTE189   | +                                           | +                                       | +                                                         | +                                               | +                                        | +                                    | +          |
| KEYNOTE407   | +                                           | +                                       | +                                                         | +                                               | +                                        | +                                    | +          |
| MONET1       | +                                           | +                                       | +                                                         | +                                               | +                                        | +                                    | +          |
| ORIENT-11    | +                                           | +                                       | +                                                         | +                                               | +                                        | +                                    | +          |

Figure S1 Assessment of risk of bias

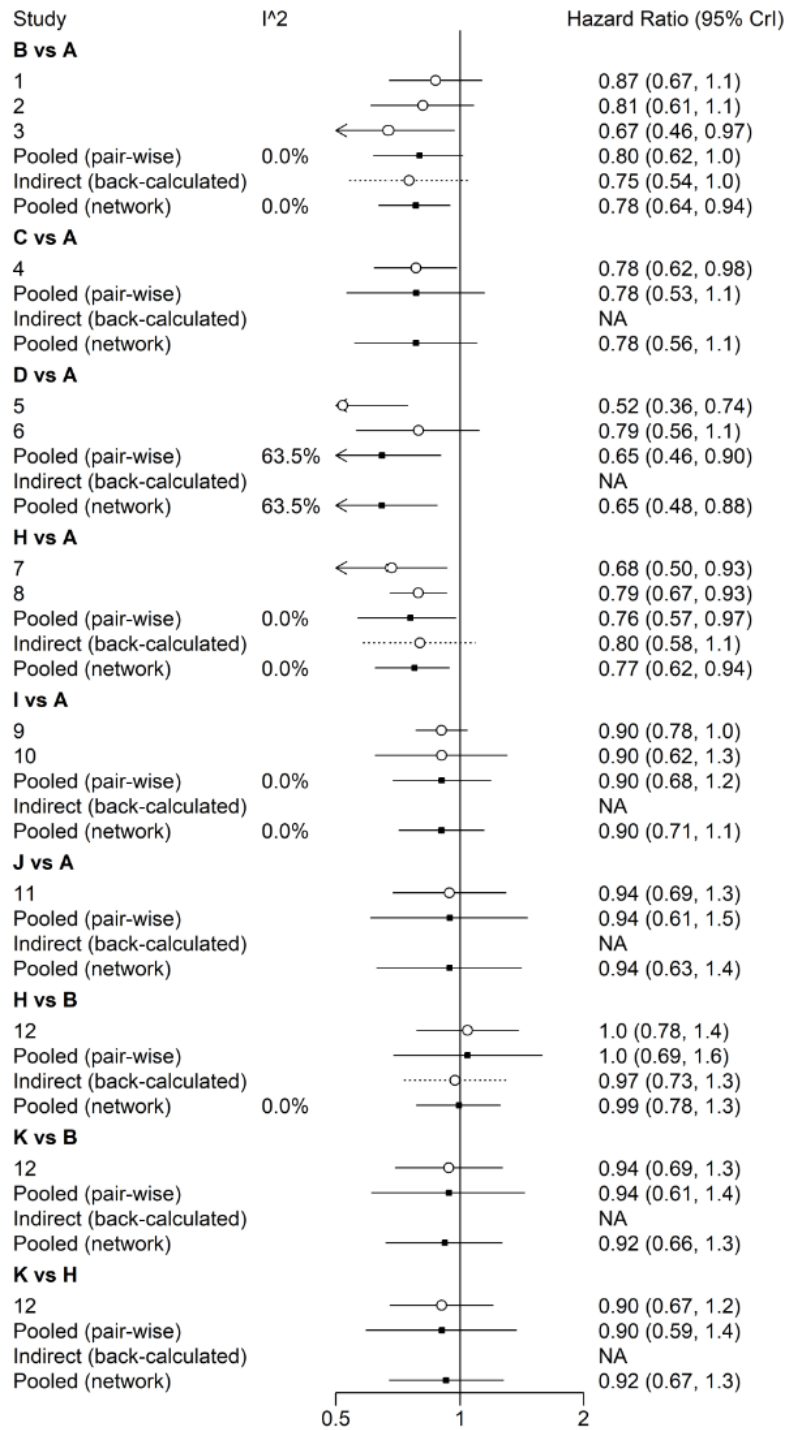

A: Forest plots of pairwise comparisons with heterogeneity estimates for OS

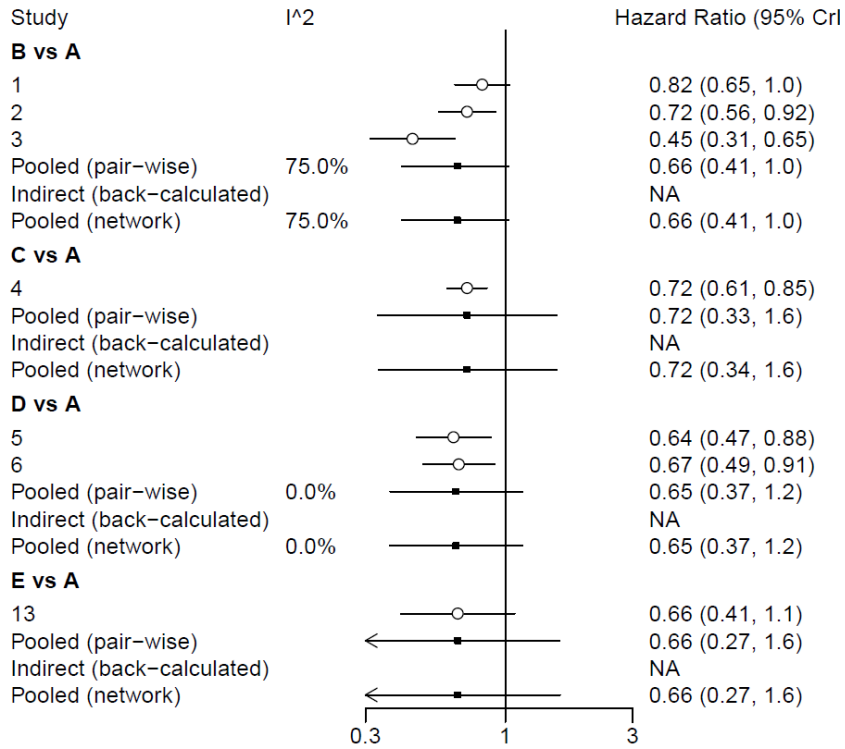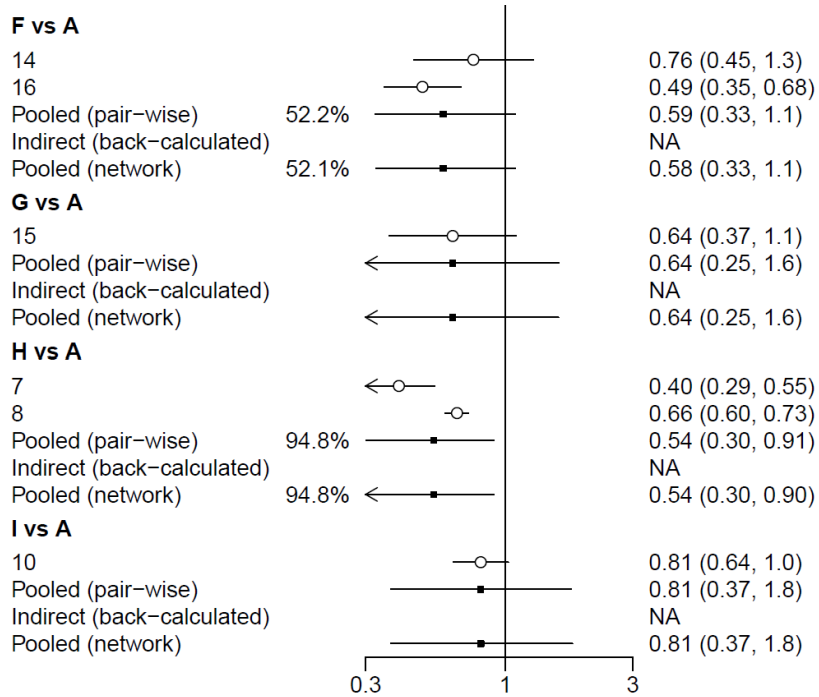

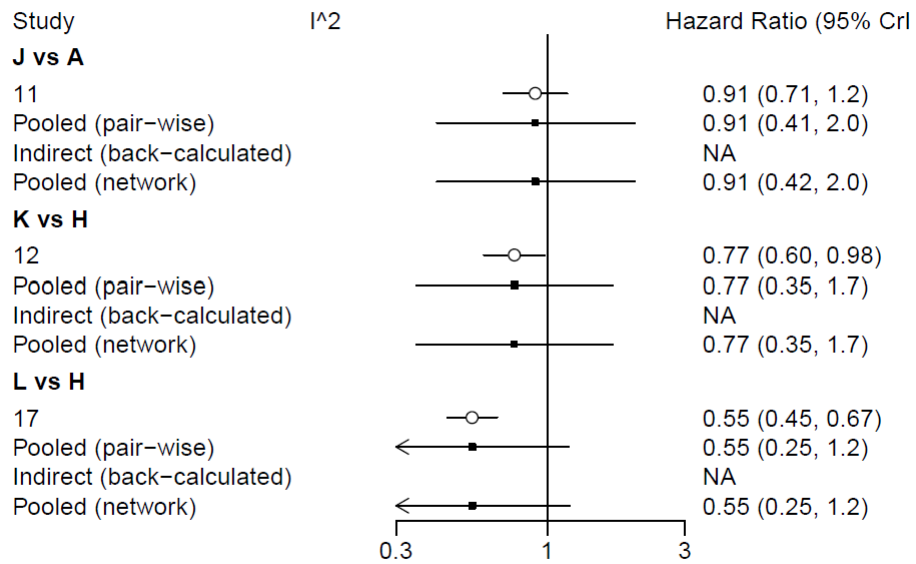

B: Forest plots of pairwise comparisons with heterogeneity estimates for PFS.

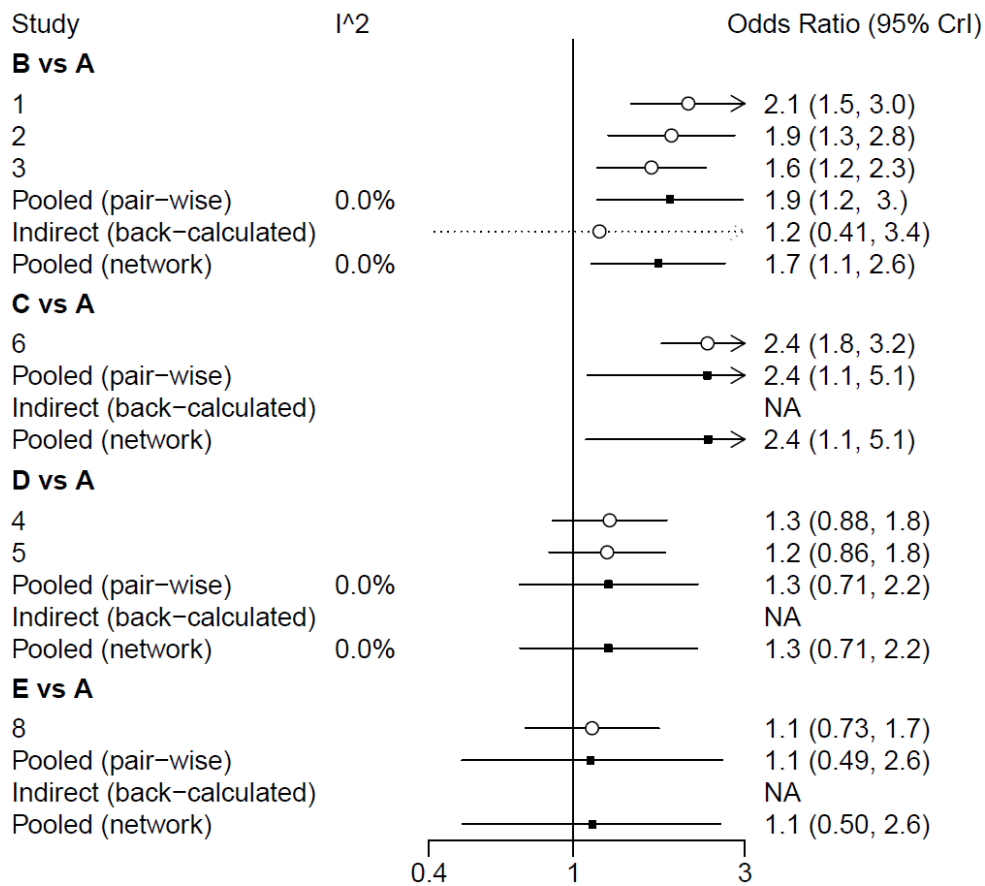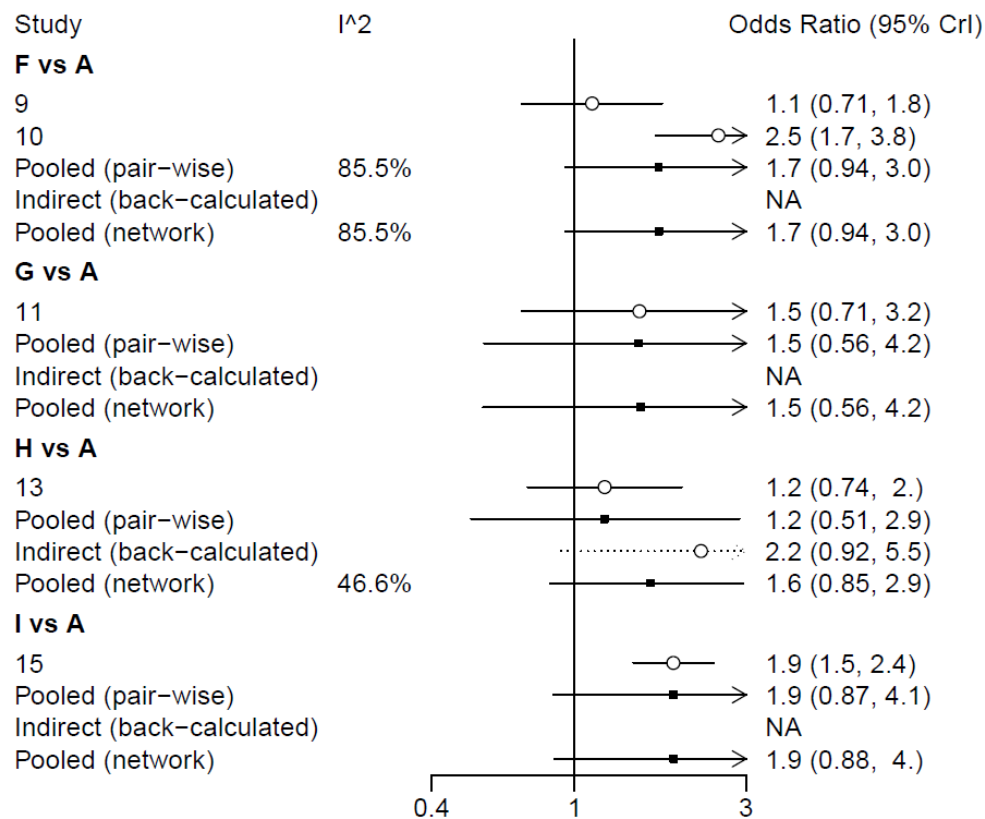

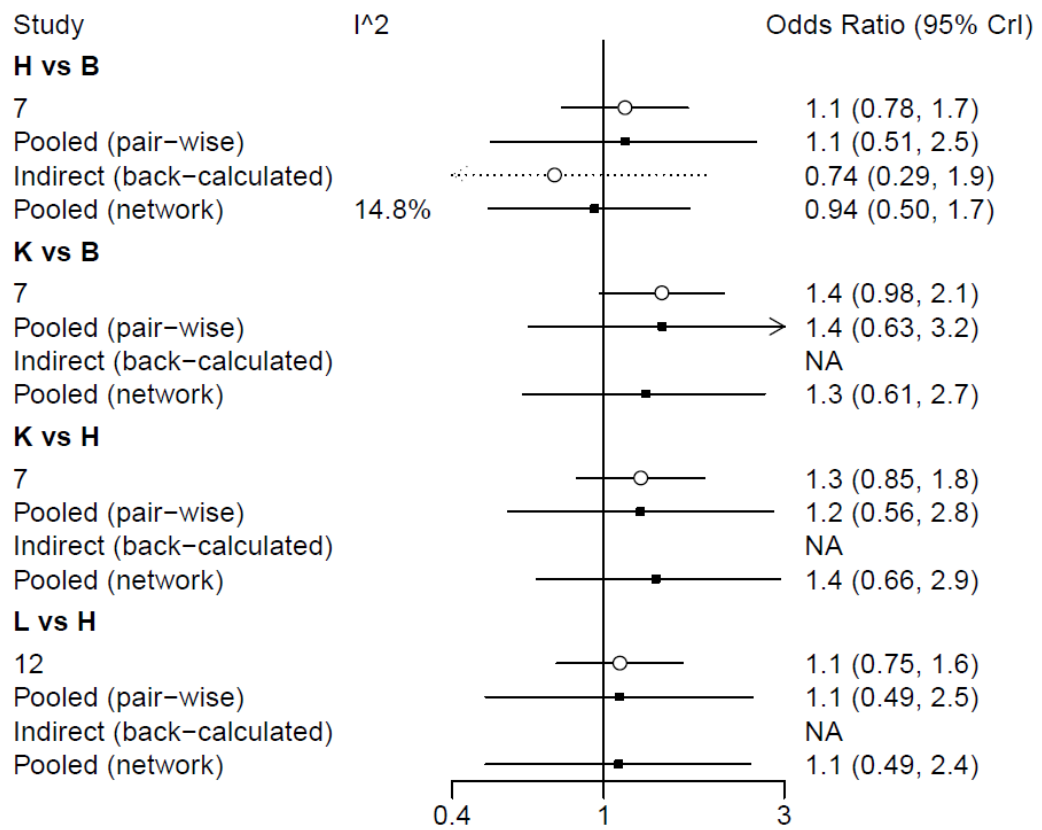

C: Forest plots of pairwise comparisons with heterogeneity estimates for safety( $\geq 3AE$ )

**Figure S2: Forest plots of pairwise comparisons with heterogeneity.**



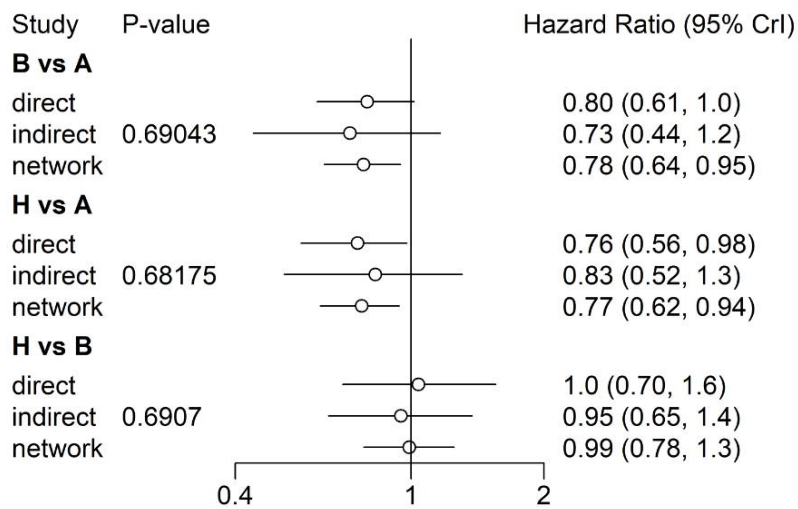

A: Node-splitting analysis of inconsistency for OS

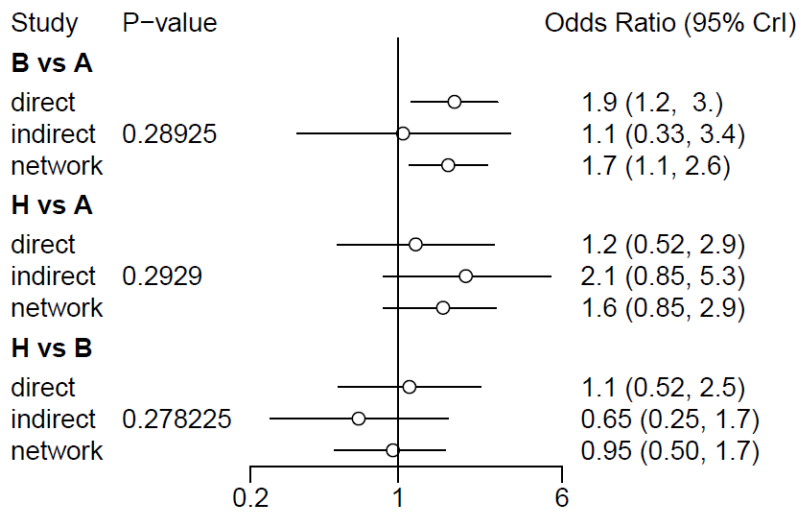

B: Node-splitting analysis of inconsistency for PFS

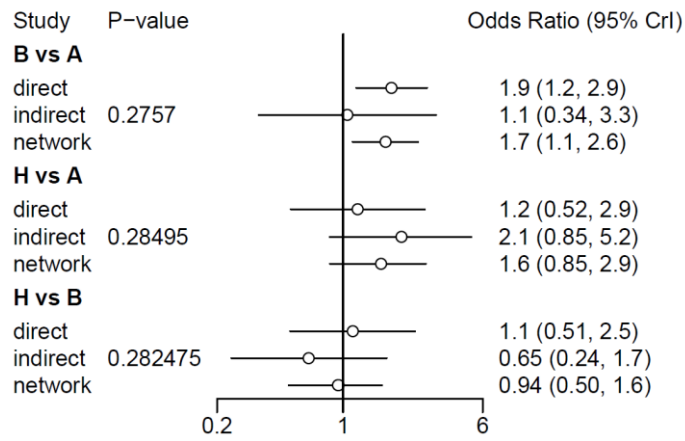

C: Node-splitting analysis of inconsistency for safety( $\geq 3$ AE)

**Figure S3: Node-splitting analysis of inconsistency.**

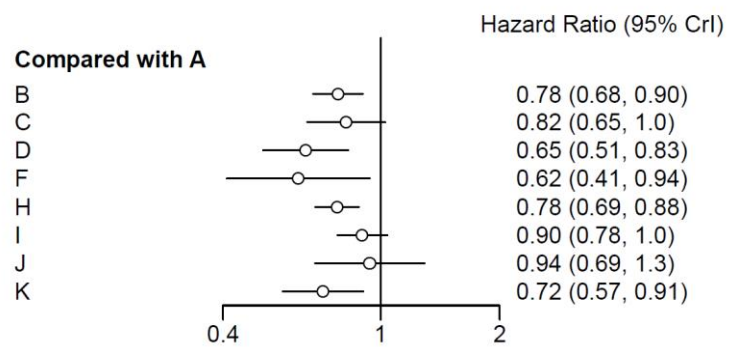

A: Forest plot for OS

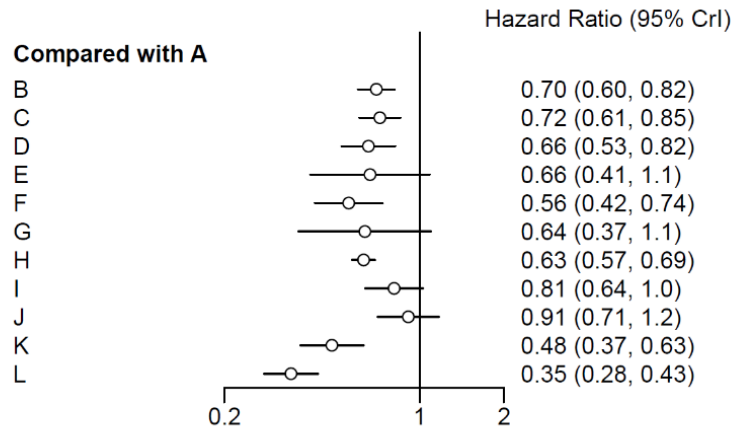

B: Forest plot for PFS

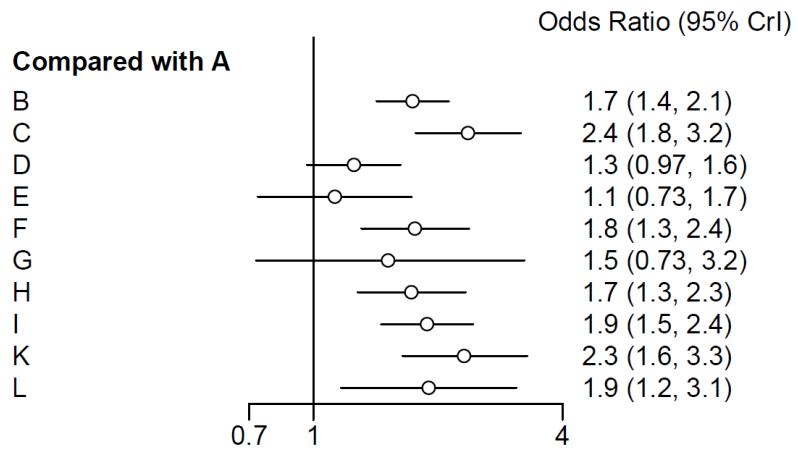

C: Forest plot for  $\geq 3AE$

Figure S4: Forest plots

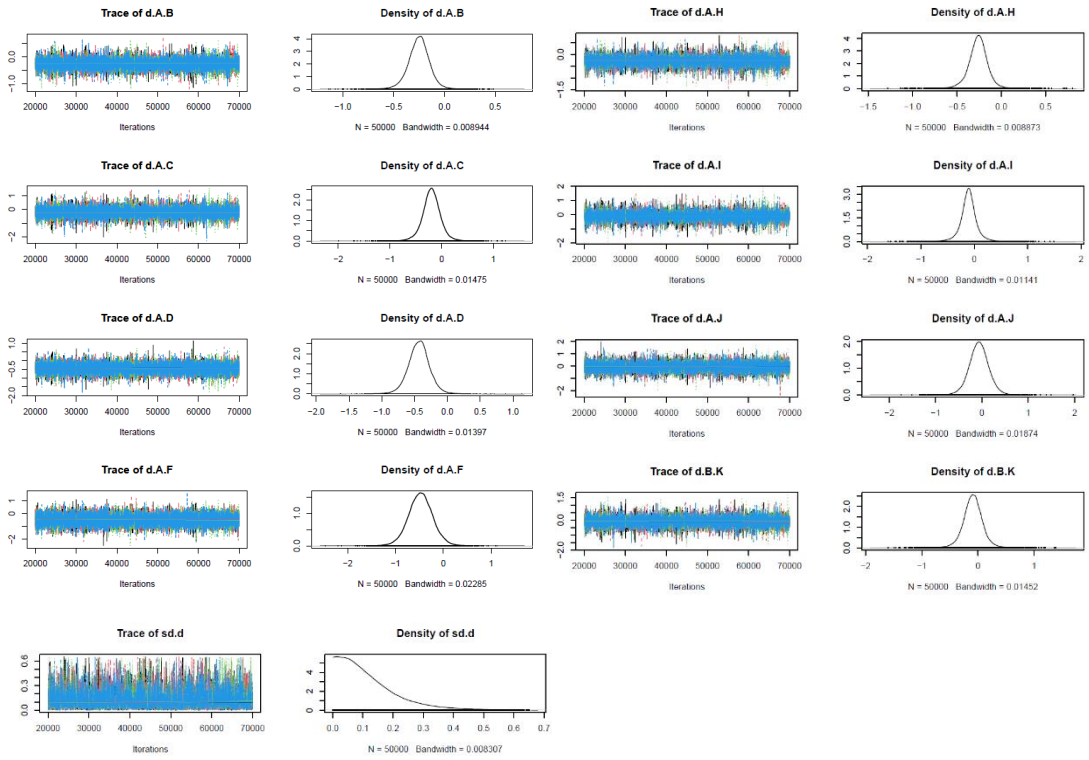

A: Trace and density plots for OS

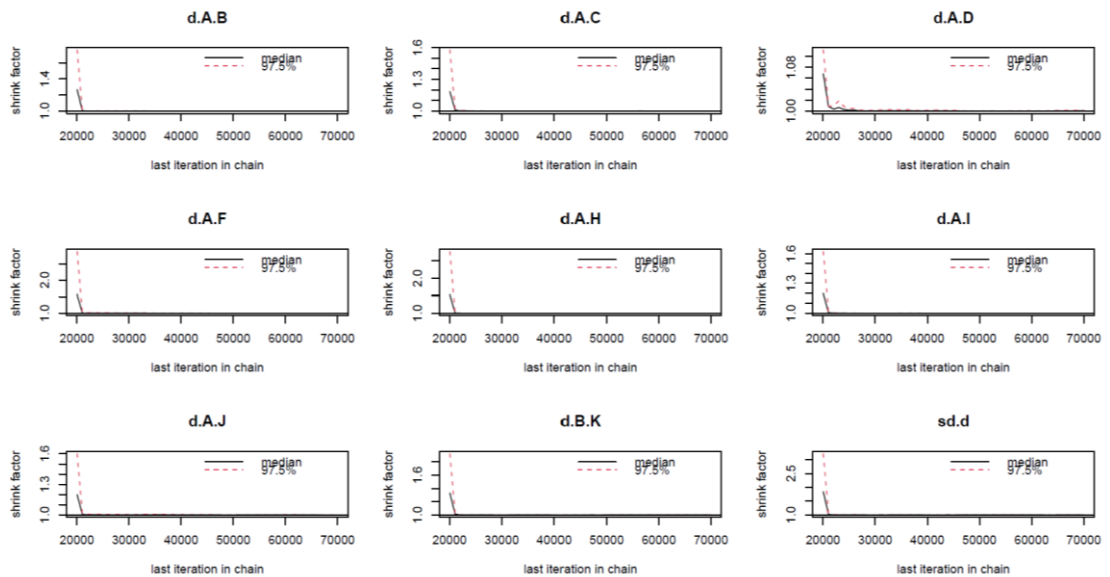

B: Brooks-Gelman-Rubin diagnosis plot for OS

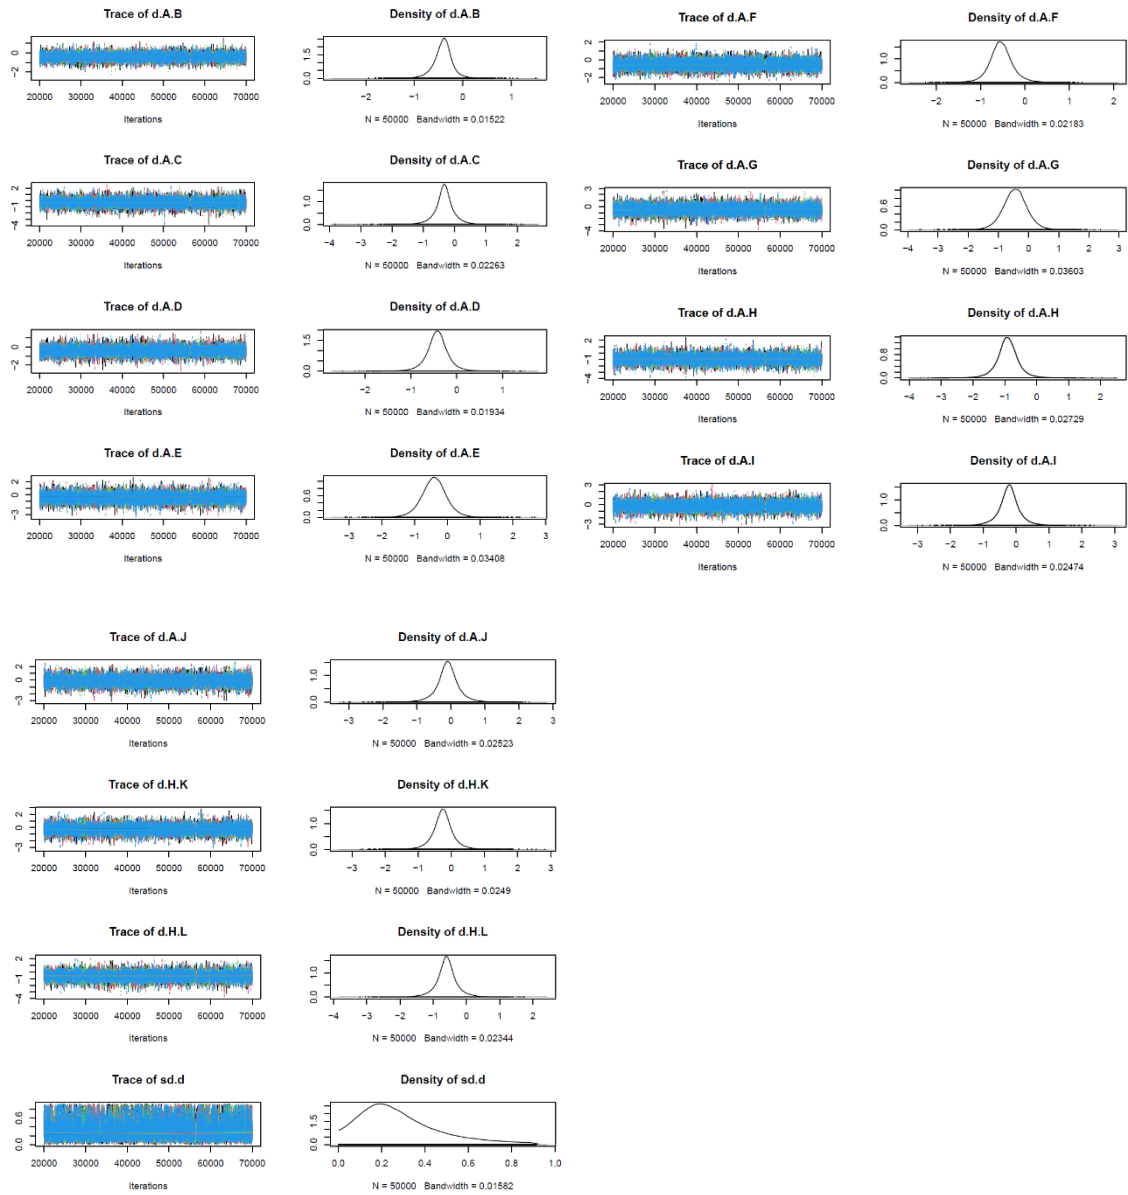

C:Trace and density plots for PFS

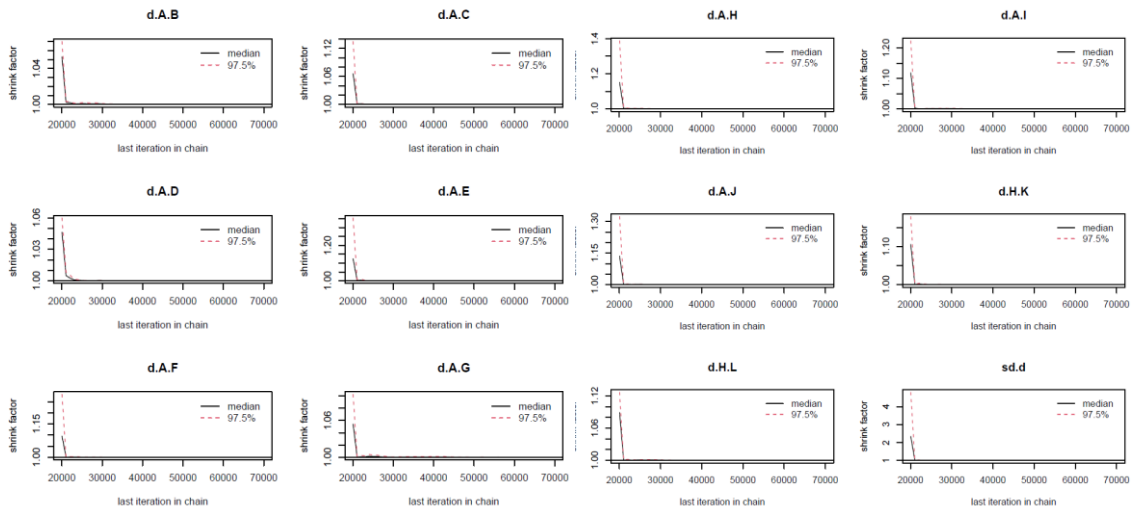

D: Brooks-Gelman-Rubin diagnosis plot for PFS

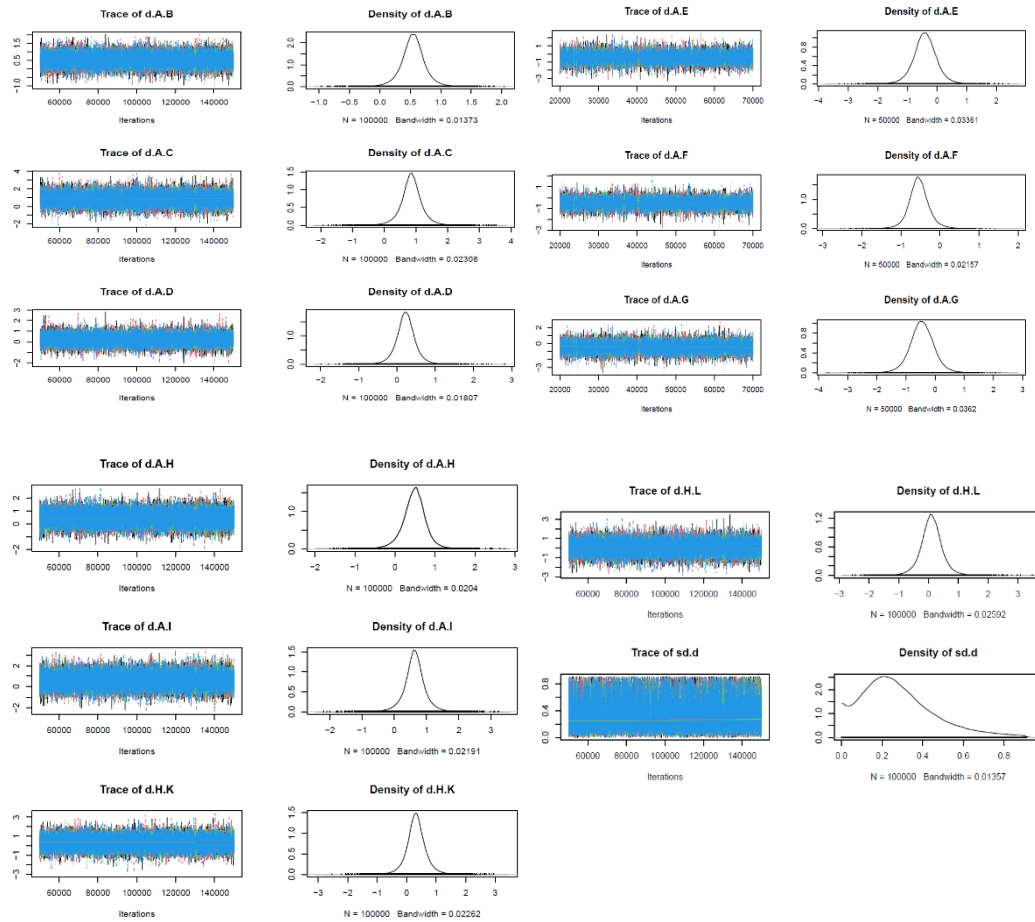

E: Trace and density plots for grade  $\geq 3$  adverse events

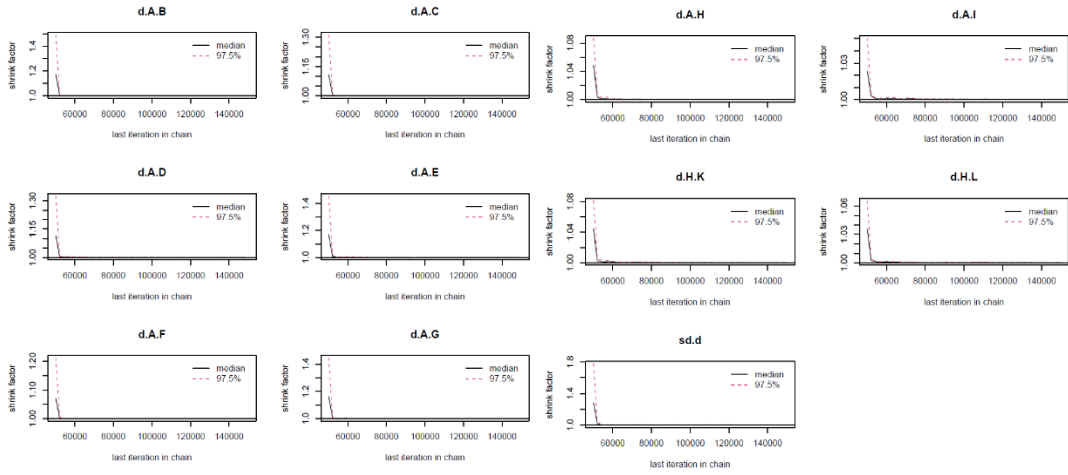

F: Brooks-Gelman-Rubin diagnosis plot for grade  $\geq 3$  adverse events

Figure S5: Trace and density plots and the Brooks Gelman-Rubin diagnostic for OS (A and B), PFS (C and D) and grade  $\geq 3$  adverse events (E and F).
